# Supplementary figures and images for: SEL1L deficiency impairs growth and differentiation of pancreatic epithelial cells
Source: Springer Nature journal article supplement (doi:10.1186/1471-213x-10-19), 2010-02-19

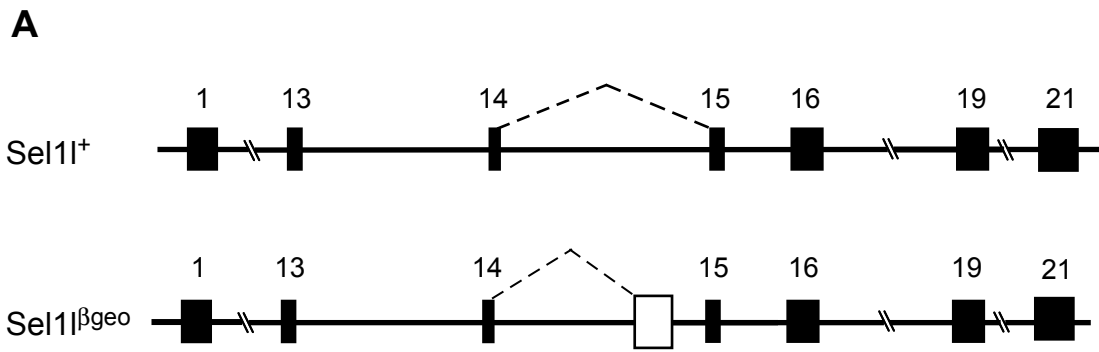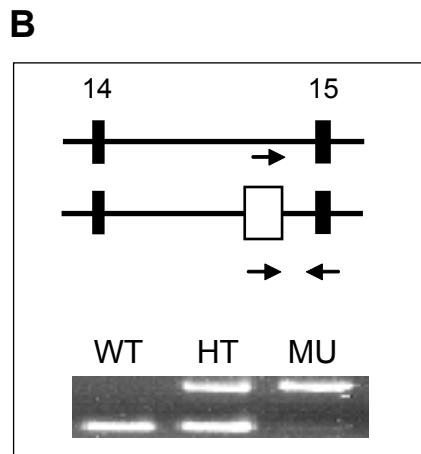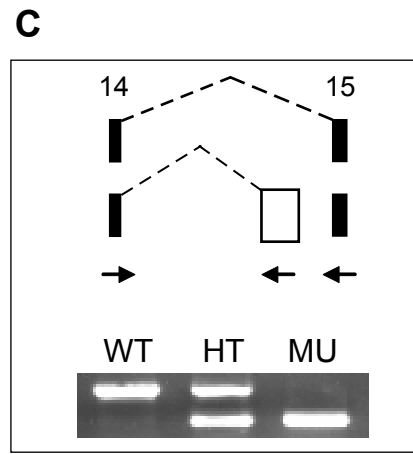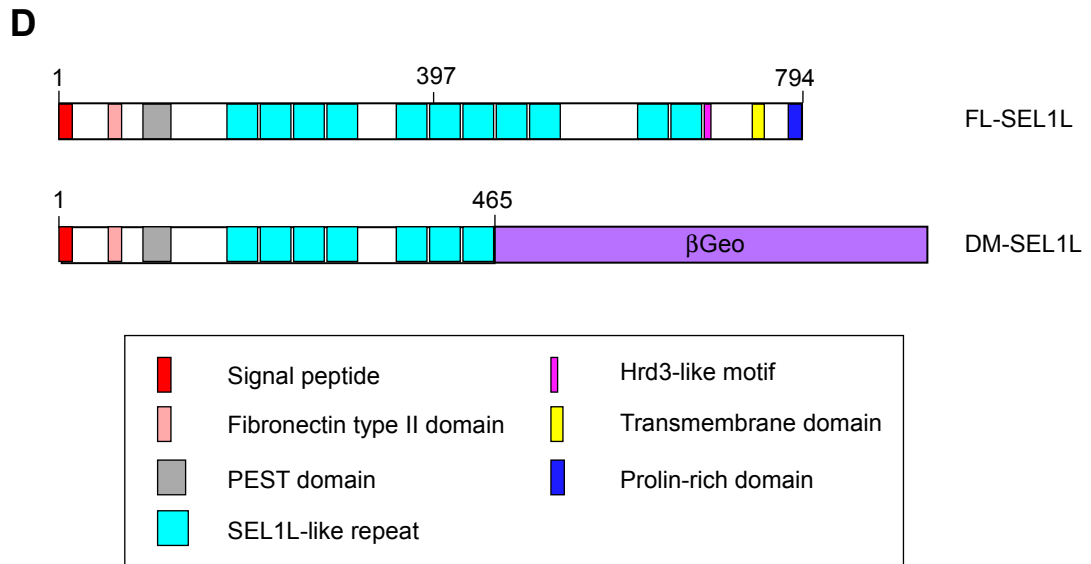

Supplement: Additional file 1 [file 1471-213x-10-19-s1.pdf]
